# Supplementary material for: Emerging patterns and trends in global cancer burden attributable to metabolic factors, based on the Global Burden of Disease Study 2019
Source: PubMed Central journal article supplement (PMC9893408; doi:10.3389/fonc.2023.1032749), 2023-01-19

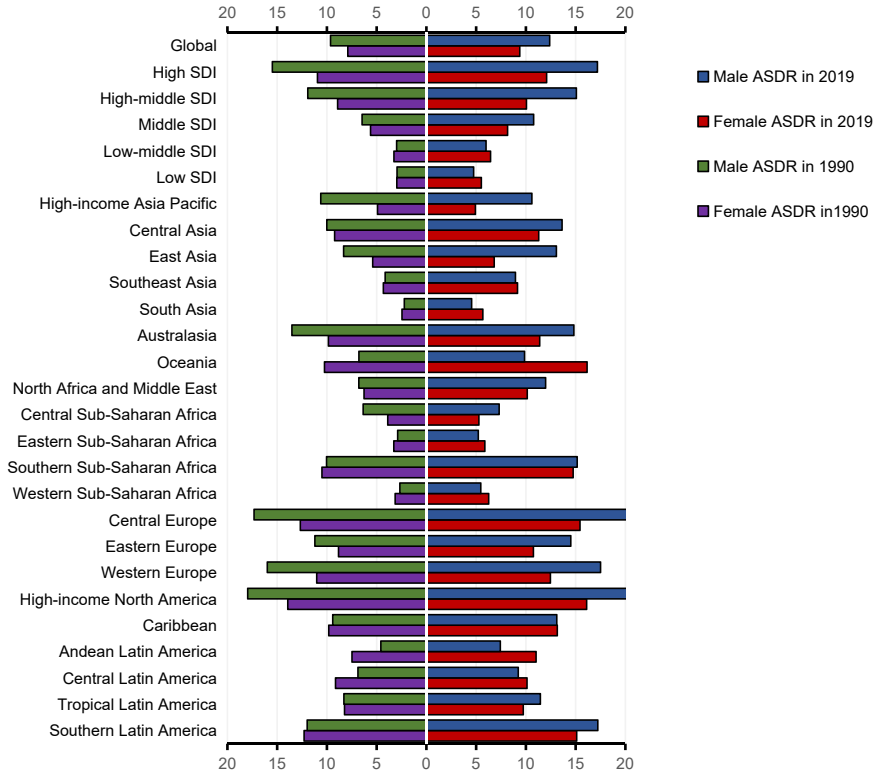

Supplement: DataSheet_2.pdf [file DataSheet_2.pdf]
