# Supplementary material for: Emerging patterns and trends in global cancer burden attributable to metabolic factors, based on the Global Burden of Disease Study 2019
Source: PubMed Central journal article supplement (PMC9893408; doi:10.3389/fonc.2023.1032749), 2023-01-19

A

Death cases attributable to High  
body-mass index( $\times 10000$ )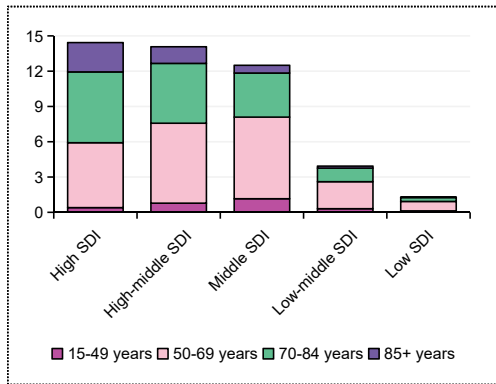

B

Percent changes in death cases attributable  
to High body-mass index ( $\times 100\%$ )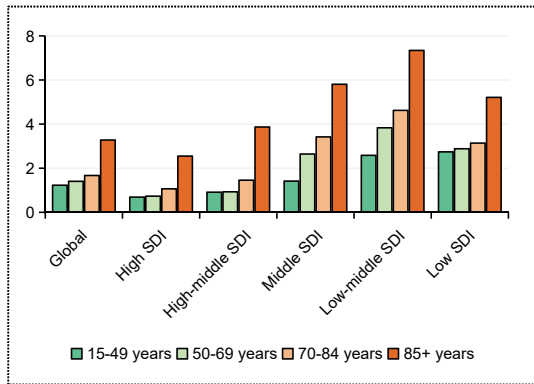

C

Death cases attributable to High  
fasting plasma glucose( $\times 10000$ )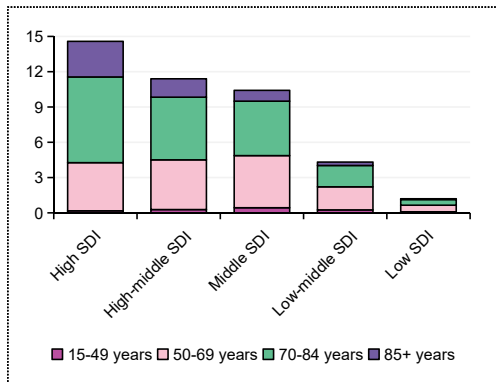

D

Percent changes in death cases attributable  
to High fasting plasma glucose ( $\times 100\%$ )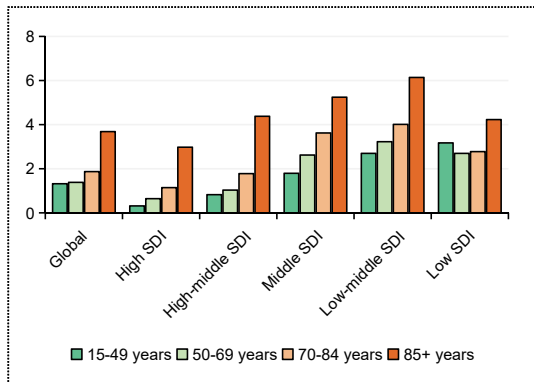

Supplement: DataSheet_5.pdf [file DataSheet_5.pdf]
